# Supplementary material
Source: PubMed Central journal article supplement (PMC6446246)

Appendix :

|                                                         |     |
|---------------------------------------------------------|-----|
| Appendix Table S1 : Sequences of the other single siRNA | p2  |
| Appendix Table S2 : Primer table                        | p3  |
| Appendix Figure S1 :                                    | p4  |
| Appendix Figure S2 :                                    | p6  |
| Appendix Figure S3 :                                    | p8  |
| Appendix Figure S4 :                                    | p10 |

Appendix Table S1 : Sequences of the other single siRNA

| siRNA        | Sense sequence      | Antisense sequence   |
|--------------|---------------------|----------------------|
| UBTD1single1 | CAAGCGAGCAGGACGCAAU | GGAGCAAACGGGAUGAGUU  |
| UBTD1single2 | GAAGCAGGUUCGAGCCAC  | CCACAAGGGCCAACCAGGA  |
| ROCK1        | GGUUAGAACAAGAGGUAAA | CAACCAAGAAAGAGAGAA   |
| ROCK2        | UGAAAGAAAUGGAGAAGAA | UGAAAGAGCUGGAGAUCAA  |
| LATS1        | CACGGCAAGAUAGCAUGGA | CAUACGAGUCAAUUCAGUAA |
| LATS2        | AAAGGCGUAUGGCGAGUAG | GCCACGACUUAUUCUGGAA  |

Appendix Table S2 : Primer table

|                      | <b>Forward</b>           | <b>Reverse</b>           |
|----------------------|--------------------------|--------------------------|
| <i>RPLP0</i>         | GCATCAGTACCCAATTCTATCAT  | AGGTGTAATCCGTCTCCACAGA   |
| <i>Snail</i>         | TCGGAAGCCTAACTACAGCGA    | AGATGAGCATTGGCAGCGAG     |
| <i>fibronectin 1</i> | CGGTGGCTGTCAGTCAAAG      | AAACCTCGGCTTCCTCCATAA    |
| <i>αSMA</i>          | GCGTGGCTATTCCTTCGTTAC    | CATAGTGGTGCCCCCTGATAG    |
| <i>Vimentin</i>      | TTTCTCTGCCTCTTCCAAACTTTT | CCTGTCCATCTCTAGTTTCAACCG |
| <i>birc5</i>         | AGCATTCGTCCGGTTGCGCT     | TCGATGGCACGGCGCACTTT     |
| <i>cyr61</i>         | AGCCTCGCATCCTATAACAACC   | TTCTTTCACAAGGCGGCACTC    |
| <i>ctgfl</i>         | CAGCATGGACGTTTCGTCTG     | AACCACGGTTTGGTCCTTGG     |
| <i>e-cadherin</i>    | GGTGACAGAGCCTCTGGATA     | GATGACACAGCGTGAGAGAAG    |
| <i>Slug</i>          | CGTAGGATCTCTGGTTGTGGT    | CGAACTGGACACACATACAGTG   |

Appendix Figure S1 :

(A) Representative confocal images of E-cadherin and UBTD1 in confluent DU145 cells under resting (Ctrl), after calcium chelator treatment (EGTA) and recovery (Rec) conditions. E-cadherin is used as a control. (B) Representative confocal images of  $\beta$ -catenin and UBTD1 in confluent A549 cells under resting (Ctrl), after calcium chelator treatment (EGTA) and recovery (Rec) conditions. (C) Representative confocal images of  $\beta$ -catenin and UBTD1 in A549 cells after cell scattering induced by HGF treatment (24 h). (D) Representative confocal images of  $\beta$ -catenin and UBTD1 localization depending on the actin cytoskeleton using cytochalasin D (CytoD) treatment in confluent DU145 cells. (E) Representative confocal images of YAP and UBTD1 localization on two matrices of different stiffnesses. DU145 cells were transfected with the indicated siRNA (control, siCTRL; UBTD1: siUBTD1pool) for 24h and were grown on fibronectin/acrylamide-coated glass coverslips (soft) or directly on glass coverslips (stiff). (F) Representative confocal images of  $\beta$ -catenin and UBTD1 localization in two different cell densities of DU145 cells transfected with the indicated siRNA (control, siCTRL; UBTD1: siUBTD1pool). For microscopy imaging panels (A, B, C, D, E, F), nuclei were stained with DAPI (Blue) on the MERGE image.

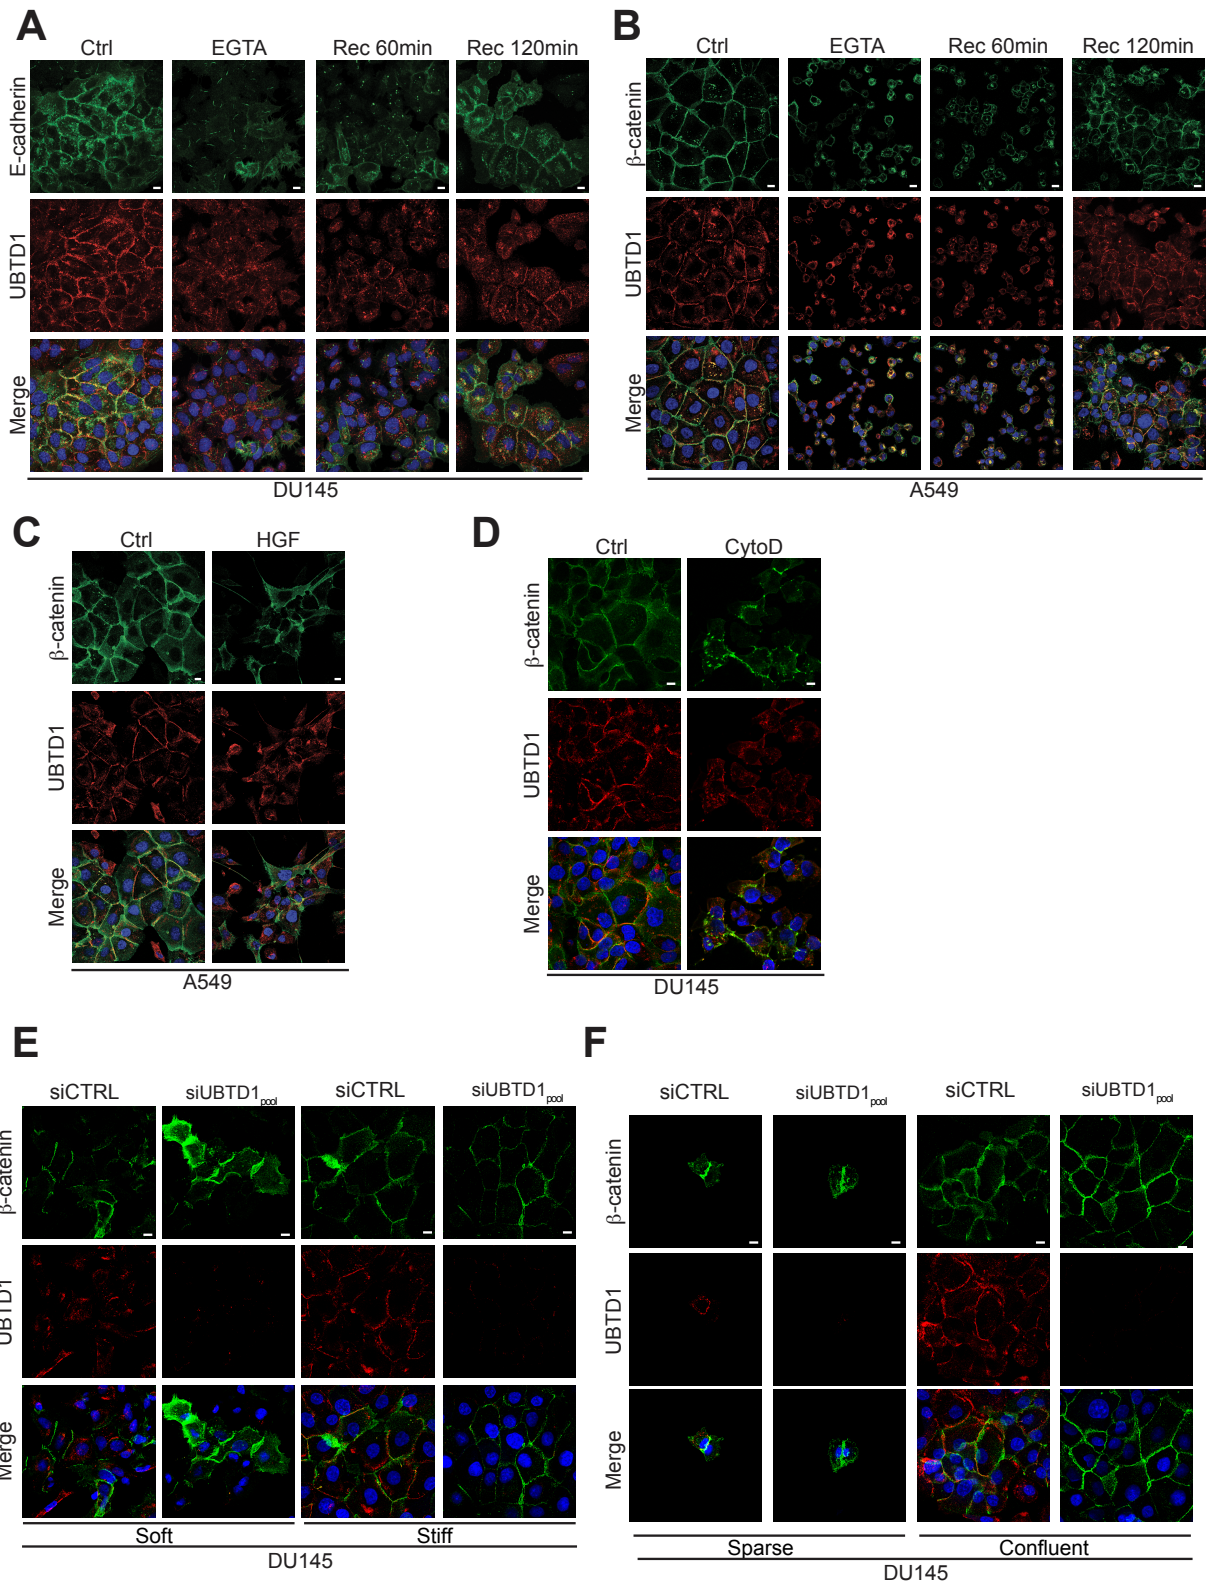

**Appendix Figure S1**

Appendix Figure S2 :

(A) Immunoblots (up) and quantification (down) of YAP levels in sub-confluent DU145 or A549 UBTD1 depleted cells treated or not with cycloheximide (CHX) for 2h. Immunoblot of UBTD1 shows the level of siRNA depletion. Actin was used as a loading control. (B) Representative wide-field image of proximal ligation assay monitoring (left) and quantification (right) of UBTD1 interaction with YAP depending on actin cytoskeleton using cytochalasin D (CytoD) treatment in DU145 and A549 cells. (C) Representative wide-field image of proximal ligation assay, showing the absence of interaction between UBTD1 and ubiquitin. For microscopy imaging panels (B, C), nuclei were stained with DAPI (Blue) on the MERGE image. (D) The immunoblot of His shows the level of His-Ub transfection for YAP ubiquitylation in HEK cells in Figure 4H.

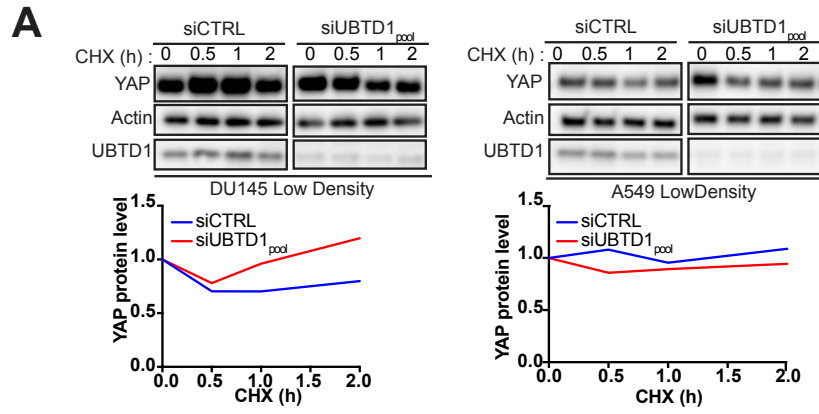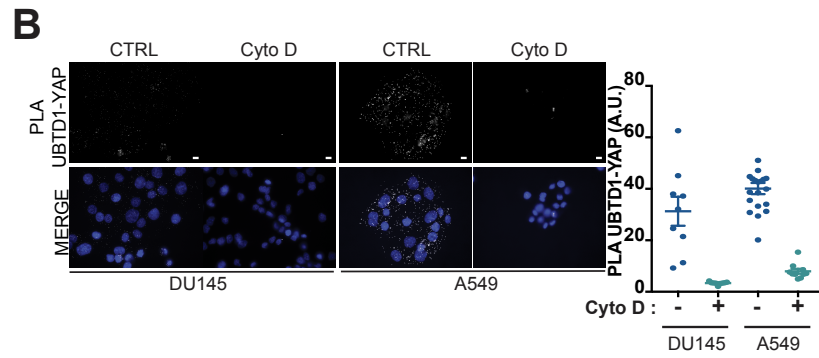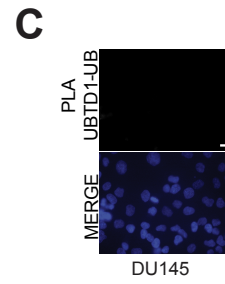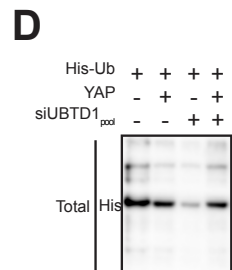

Appendix Figure S2

Appendix Figure S3 :

(A) Immunoblots of p-YAP and YAP in confluent A549 control (siCTRL) or depleted for LATS1 and LATS2 (siLATS1+siLATS2) and/or UBTD1 (siUBTD1pool). Immunoblot of p-YAP reflects the activity of the Hippo pathway. Immunoblots of UBTD1 and LATS show siRNA knock-down efficiency. Actin was used as a loading control. (B-C) Representative confocal immunofluorescence images (B) and quantification (C) showing endogenous YAP nuclear translocation in confluent A459 cells control (siCTRL) or depleted for LATS1 and LATS2 (siLATS1+siLATS2) and/or UBTD1 (siUBTD1pool).

For microscopy imaging panels (B), nuclei were stained with DAPI (Blue) on the MERGE image. Scale bar=10  $\mu$ m; n $\geq$ 3 independent experiments; \*P<0.05; \*\*P<0.01;

\*\*\*P<0.001;\*\*\*\*P<0.0001; (A) two tailed t-test; (G) Bonferroni's multiple comparison test; data are mean  $\pm$  s.e.m.



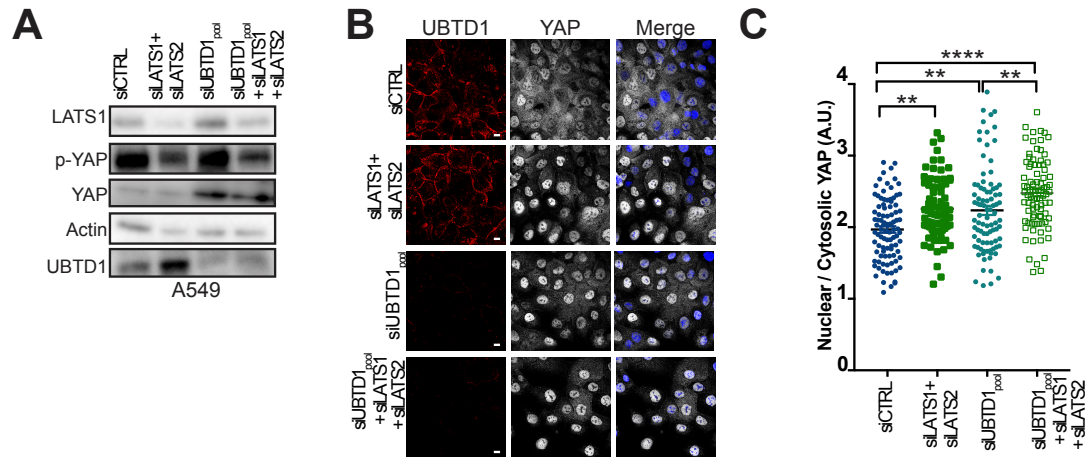

Appendix Figure S3

Appendix Figure S4 :

(A-B) Quantification of CTGF1, CYR61, BIRC5 and UBTD1 mRNA levels in confluent (A) DU145

or (B) A549 cells. (C) Quantification of AMACR and UBTD1 mRNA levels in human prostate

tumoroids depleted for UBTD1. AMACR was used as a molecular marker for prostate

carcinoma.  $n \geq 3$  independent experiments; \* $P < 0.05$ ; \*\* $P < 0.01$ ; \*\*\* $P < 0.001$ ; \*\*\*\* $P < 0.0001$ ;

(A, B) Bonferroni's multiple comparison test; data are mean  $\pm$  s.e.m.

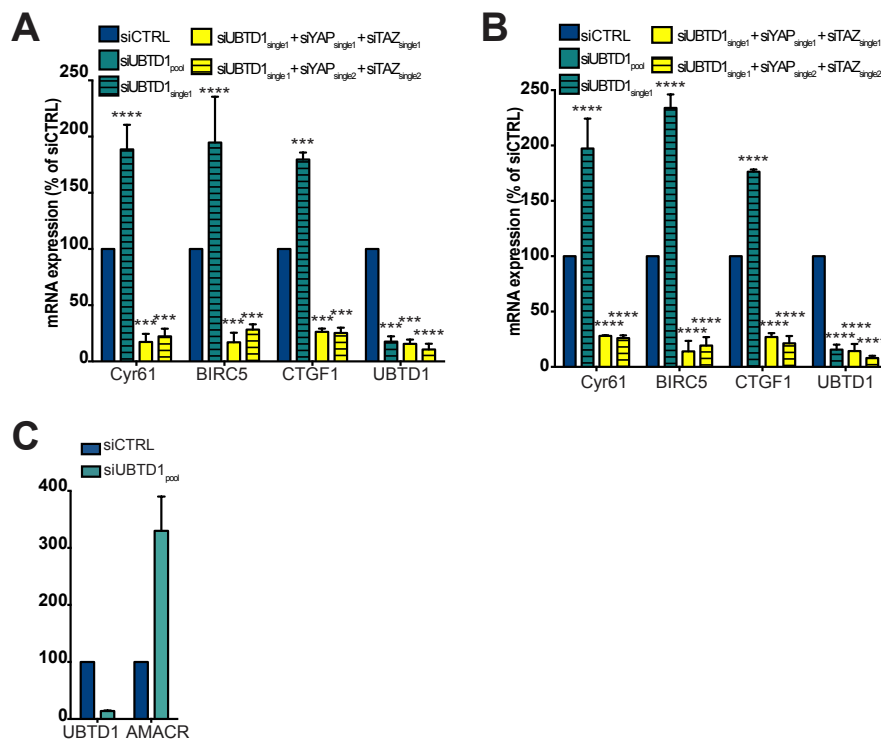

Supplement: EMBR-20-e46570-s001.pdf [file EMBR-20-e46570-s001.pdf]
