# Supplementary material
Source: PubMed Central journal article supplement (PMC6446246)

**A**

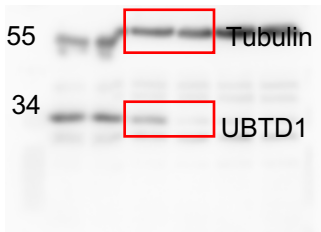

**B**

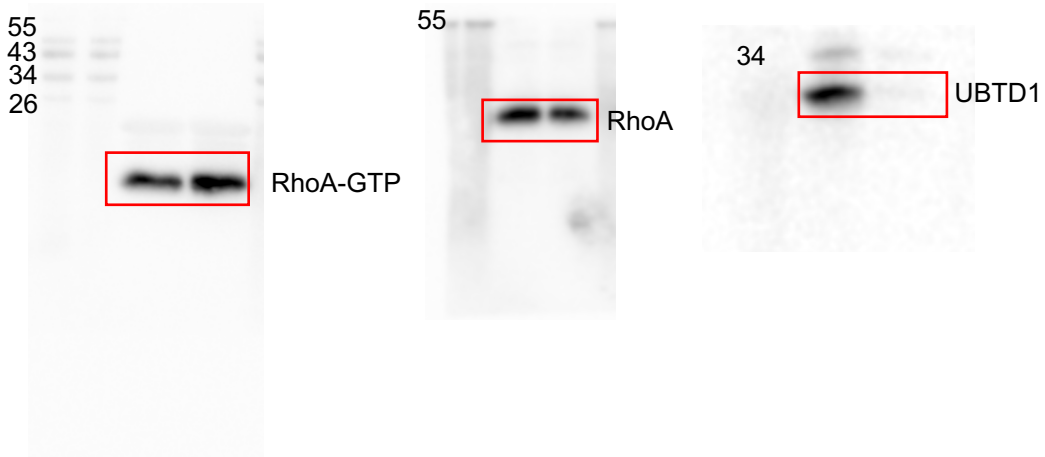

**C**

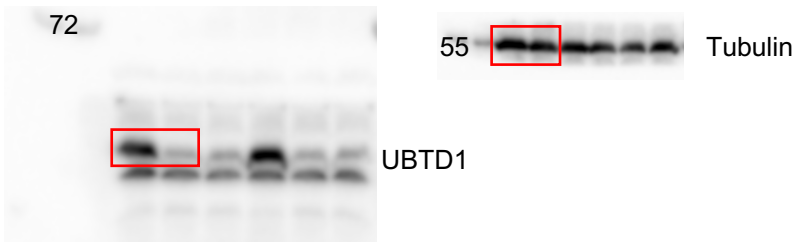

**G**

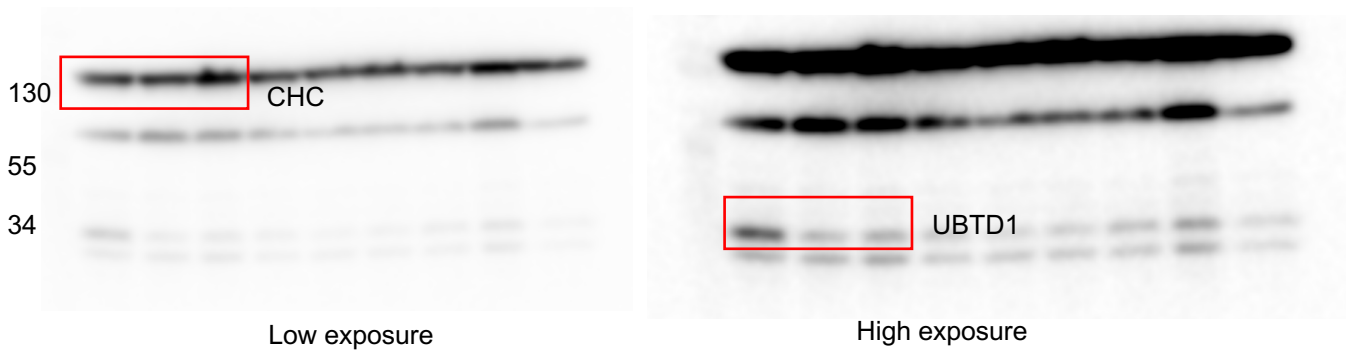

Supplement: EMBR-20-e46570-s004.pdf [file EMBR-20-e46570-s004.pdf]

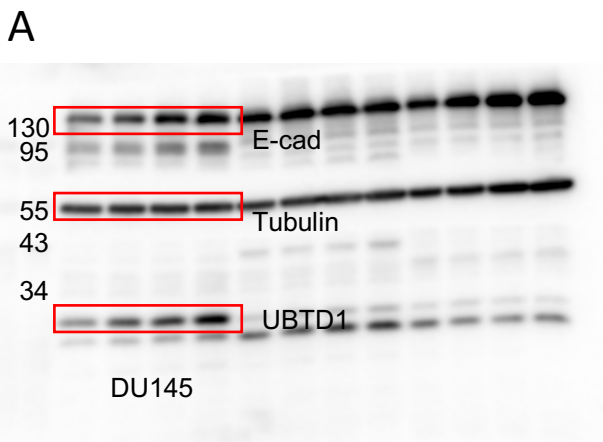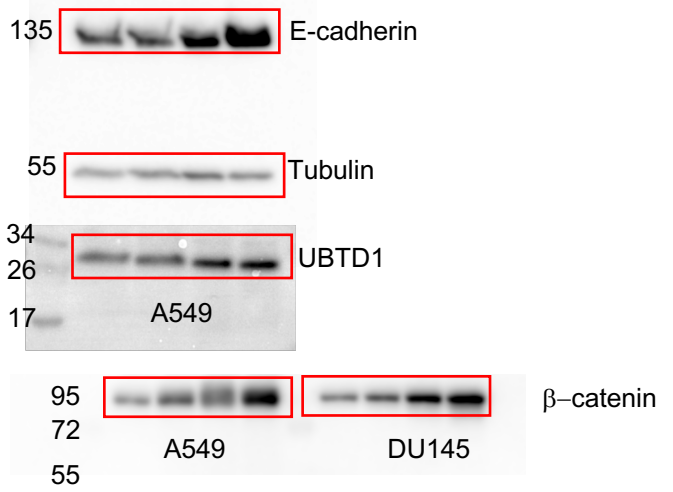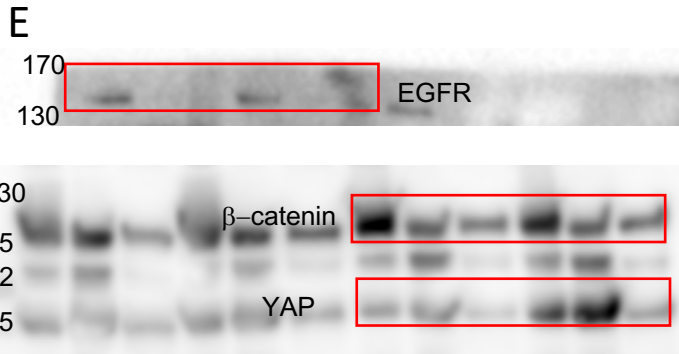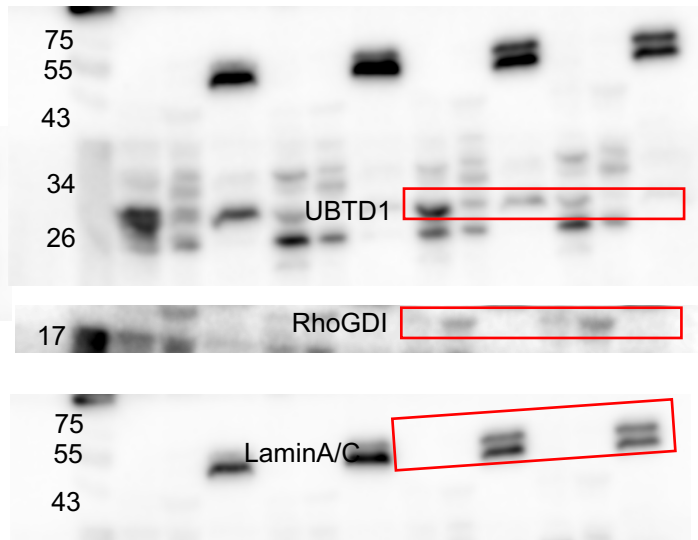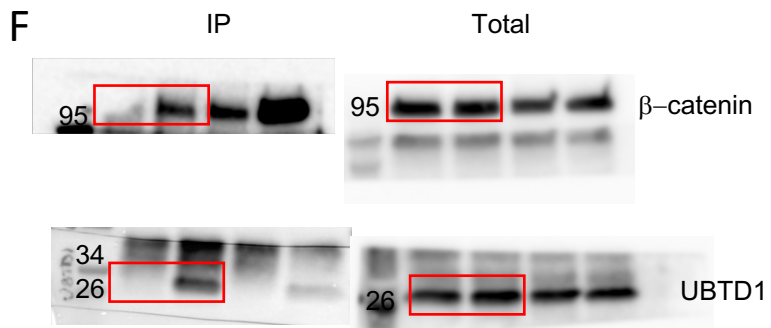

Supplement: EMBR-20-e46570-s005.pdf [file EMBR-20-e46570-s005.pdf]

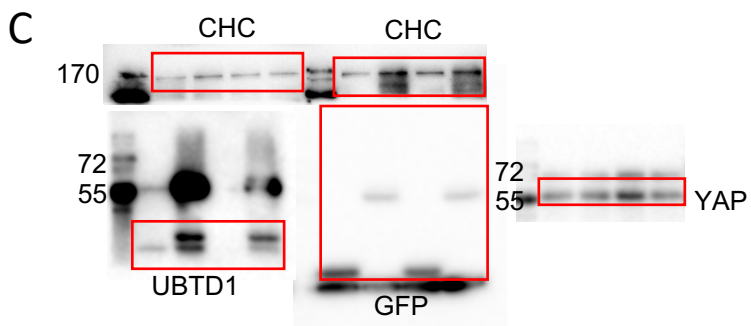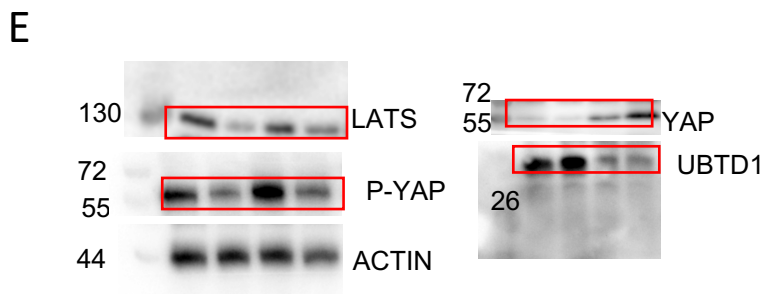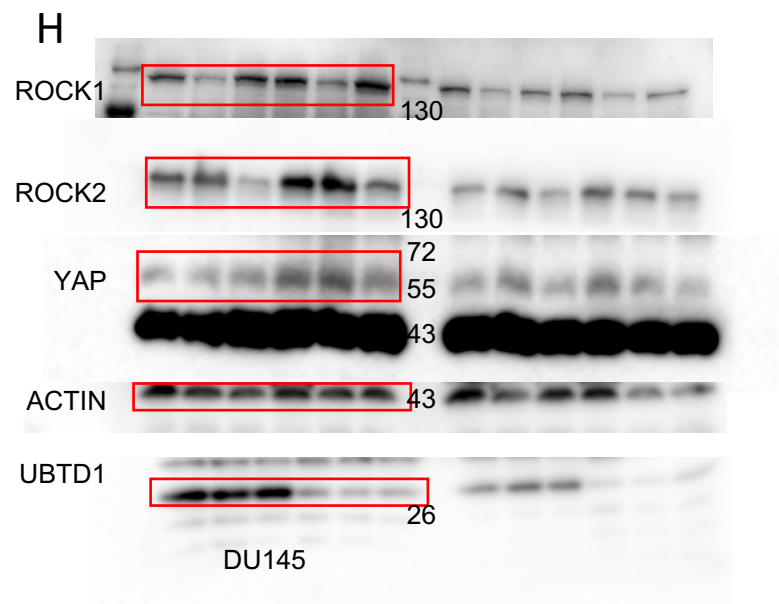

Supplement: EMBR-20-e46570-s008.pdf [file EMBR-20-e46570-s008.pdf]

A

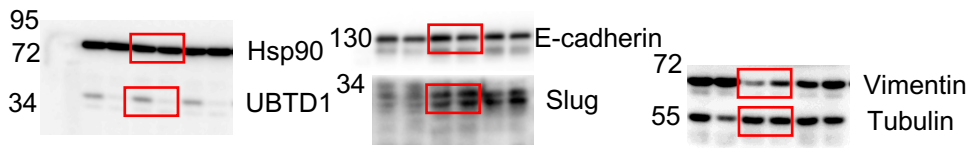

Supplement: EMBR-20-e46570-s009.pdf [file EMBR-20-e46570-s009.pdf]
